# Supplementary material
Source: PubMed Central journal article supplement (PMC5910000)

SUPPLEMENTARY DATA

**Supplementary Figure 1.** AgRP (A, C) and  $\alpha$ MSH (B, D) DMN axonal density were stained and quantified in 6 wk-old male amylin KO, Ramp 1/3 KO mice and their respective WT controls. The staining and quantification of the amylin KO and RAMP1/3 KO were done independently. N=8/group, data are expressed as mean  $\pm$  SEM \*P<0.05 and \*\*P<0.01 vs. WT mice after Student T-test.

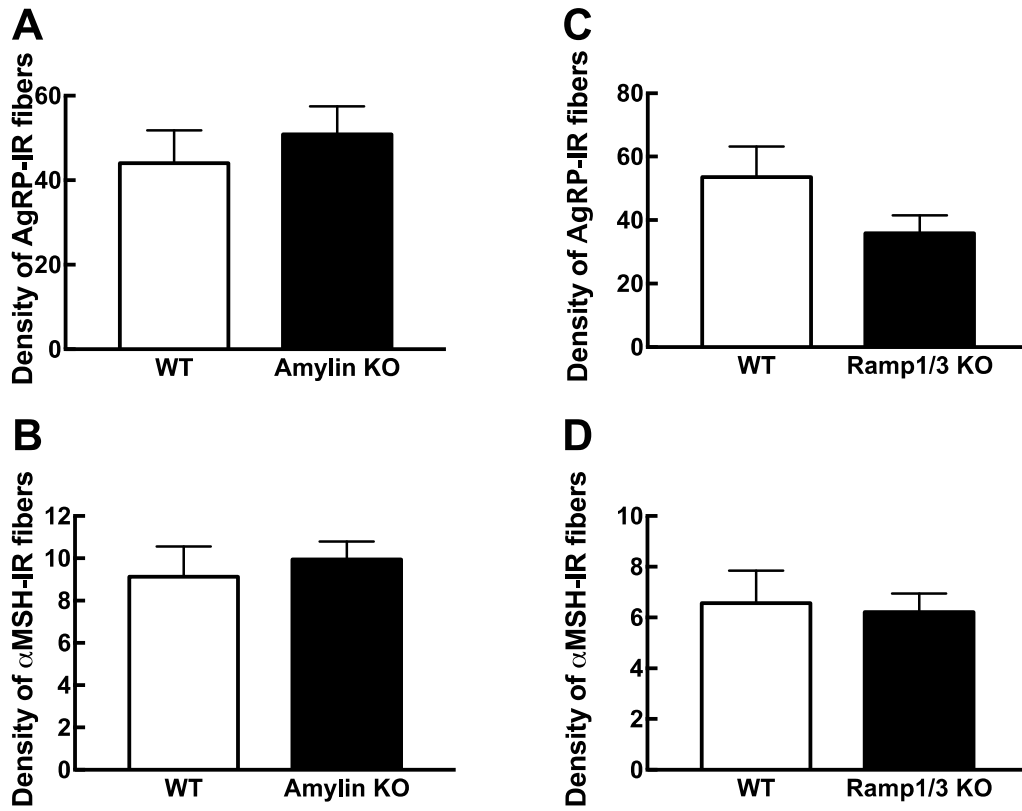

SUPPLEMENTARY DATA

**Supplementary Figure 2.** Amylin induced-pERK neurons in the (A) median eminence (ME), (B) arcuate nucleus (ARC) and (C) ventromedial nucleus of the hypothalamus (VMN) in 7 wk-old male Sprague-Dawley rats (n=8/group) 5, 15 and 45 min after amylin injection (i.p 50 µg/kg). Data are mean  $\pm$  SEM with average neuronal count per section. Parameters with differing superscripts differ from each other at the P<0.05 level by post hoc Bonferroni adjustment after significant intergroup differences were found by 2-way ANOVA.

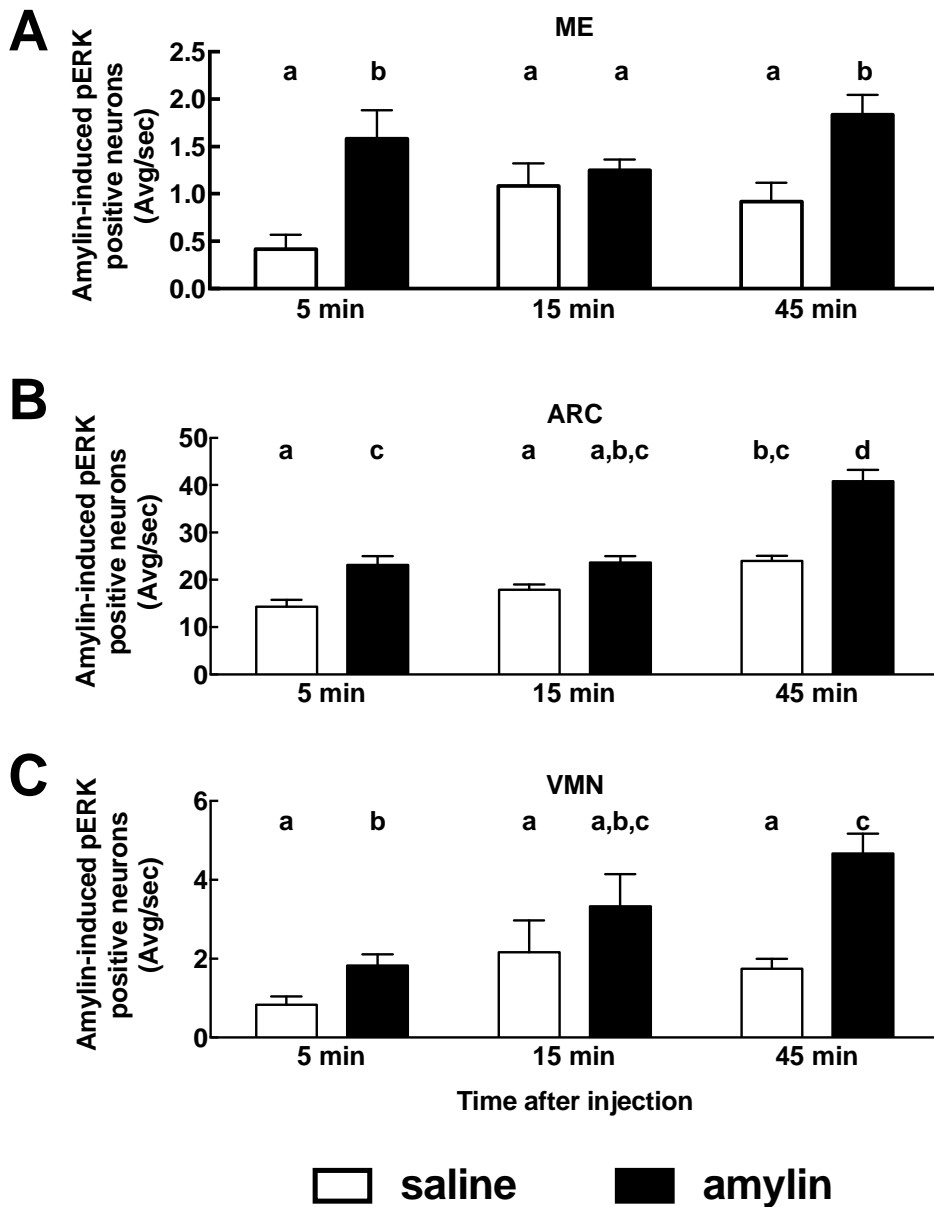

Supplement: DB171347SupplementaryData.pdf [file DB171347SupplementaryData.pdf]
